# Supplementary material
Source: ML conference proceedings conference paper supplement (https://proceedings.neurips.cc/paper_files/paper/2019/hash/b51a15f382ac914391a58850ab343b00-Abstract.html)
Supplement: Supplementary file [file b51a15f382ac914391a58850ab343b00-Supplemental.zip]

# Appendix

## A Details of the transformation between GBN and BN

The definition of GBN is as follows:

$$\hat{z} = \frac{z_{in} - \mu_B}{\sqrt{\sigma_B^2 + \epsilon}}; \quad z_{out} = \vec{\phi}(\gamma \hat{z} + \beta), \quad \vec{\phi} \in \mathbb{R}^c$$

According to [26], the magnitude of  $\gamma$  provides the information about the filter ranking. We can take advantage of this information through the following transformation. First, we convert the BN to GBN using the following formula:

$$\begin{aligned} \vec{\phi} &:= \gamma \\ \beta &:= \frac{\beta}{\gamma} \\ \gamma &:= \mathbf{1} \end{aligned}$$

Then we fix  $\gamma$  by setting it to non-updatable during the pruning. When the pruning is finished, we convert GBN back to BN by merging  $\vec{\phi}$  into  $\gamma$  and  $\beta$ :

$$\begin{aligned} \gamma &:= \vec{\phi} \\ \beta &:= \beta \vec{\phi} \end{aligned}$$

## B The Design of Gated Convolution

Let  $W \in \mathbb{R}^{c \times k \times k}$  denote a  $k \times k$  convolution kernel of a filter, and  $X, Y \in \mathbb{R}^{c \times h \times w}$  denote the input and output tensors, respectively. We note the convolution operation as:

$$Y = X \otimes W$$

We use the following formula to convert the filter to the gated version:

$$\begin{aligned} \phi &:= \frac{\|W\|_F}{ck^2} \\ W &:= \frac{W}{\phi} \end{aligned}$$

And we modify the convolution operation to:

$$Y = \phi(X \otimes W)$$

When the pruning is finished, we merge  $\phi$  into  $W$ :

$$W := \phi W$$

## C Segmentation Instances

We tested the effect of the proposed method on the semantic segmentation task by pruning an FCN-32s [36] network on the extended PASCAL VOC 2011 dataset [29, 9]. Since there is no BN layer in the FCN-32s network structure, we replace the convolution layer with the Gated Convolution designed in Appendix B. Our code is taken from [42] and follow its default training settings. When

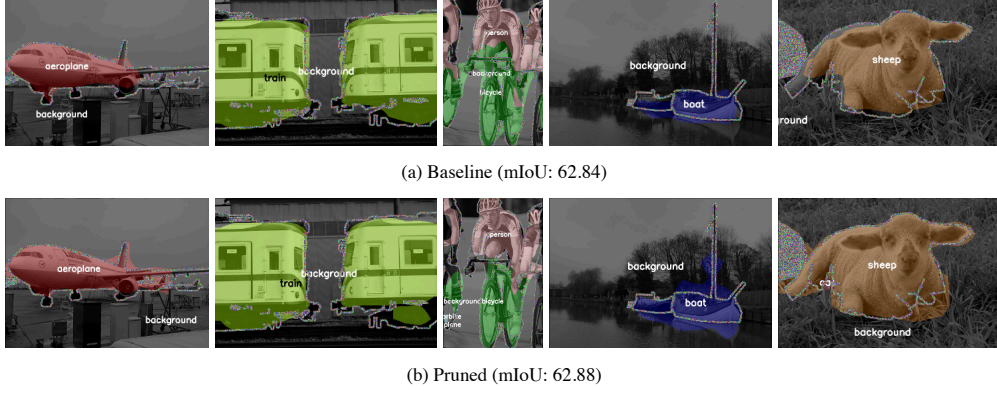

Figure 6: The segmentation instances.

450 training the baseline, the batch size is set to 1, and the learning rate is set to  $10^{-10}$ . In the TICK  
 451 phase, the learning rate is set to  $10^{-10}$ . In the Tock phase, we are using a 1-cycle strategy [40], and  
 452 the learning rate linearly varies from  $10^{-11}$  to  $10^{-10}$ . In the Fine-tune stage, we still used  $10^{-10}$   
 453 learning rates to train the network for 10 epochs. Figure 6 shows the segmentation results from (a)  
 454 the baseline network and (b) the pruned network. The pruned network reduces the FLOPs by 27%  
 455 and the parameters amount by 73% while maintain the mIoU ( $62.84\% \rightarrow 62.86\%$ )

#### 456 D Structure of Pruned ResNet-50 (GBN-60).

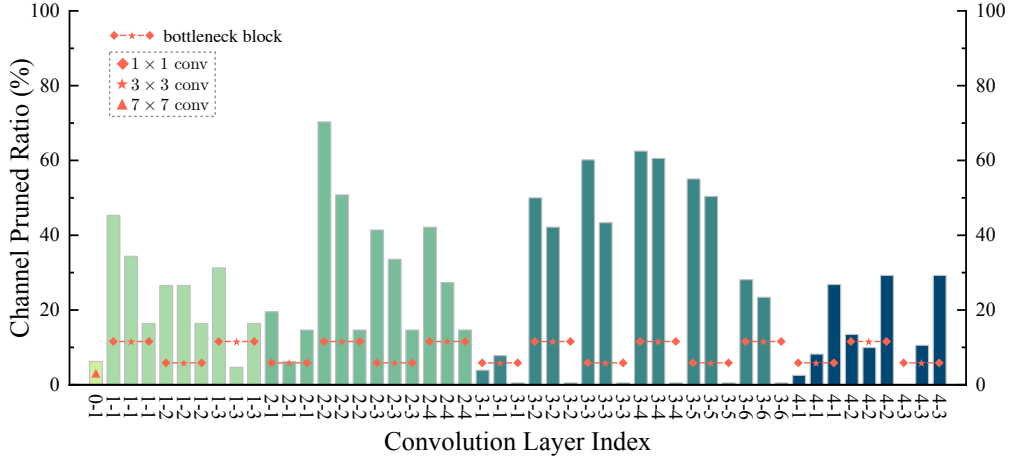

Figure 7: The channel pruning percentage of each convolutional layer (excluding the shortcut) of the GBN-60 network in Table 2. The index "a-b" indicates the residual block in which the convolutional layer is located. For example, "3-6" indicates the convolution layer is located in the conv3\_6 [11].

#### 457 E Structures of the Pruned Networks in Table 3

458 Figure 8 shows the structures of the pruned network in Table 3 at 80% FLOPs reduced. The minimum  
 459 number of channels is set to 9. We can get the following observations: On the one hand, the One-Shot  
 460 mode cannot accurately perform network pruning. On the other hand, the network structures obtained  
 461 by the Tick-Only and Tick-Tock modes is similar.

| One-Shot                                                                                                                                                                                                                                                                                                                                                                                                                                                                                                                                                                                                                                                                                                                                                                                                                                                                                                                                                                                                                                                                                                                                                                                                                                      | Tick-Only                                                                                                                                                                                                                                                                                                                                                                                                                                                                                                                                                                                                                                                                                                                                                                                                                                                                                                                                                                                                                                                                                                                                                                                                                                                                | Tick-Tock                                                                                                                                                                                                                                                                                                                                                                                                                                                                                                                                                                                                                                                                                                                                                                                                                                                                                                                                                                                                                                                                                                                                                                                                                                                                |
|-----------------------------------------------------------------------------------------------------------------------------------------------------------------------------------------------------------------------------------------------------------------------------------------------------------------------------------------------------------------------------------------------------------------------------------------------------------------------------------------------------------------------------------------------------------------------------------------------------------------------------------------------------------------------------------------------------------------------------------------------------------------------------------------------------------------------------------------------------------------------------------------------------------------------------------------------------------------------------------------------------------------------------------------------------------------------------------------------------------------------------------------------------------------------------------------------------------------------------------------------|--------------------------------------------------------------------------------------------------------------------------------------------------------------------------------------------------------------------------------------------------------------------------------------------------------------------------------------------------------------------------------------------------------------------------------------------------------------------------------------------------------------------------------------------------------------------------------------------------------------------------------------------------------------------------------------------------------------------------------------------------------------------------------------------------------------------------------------------------------------------------------------------------------------------------------------------------------------------------------------------------------------------------------------------------------------------------------------------------------------------------------------------------------------------------------------------------------------------------------------------------------------------------|--------------------------------------------------------------------------------------------------------------------------------------------------------------------------------------------------------------------------------------------------------------------------------------------------------------------------------------------------------------------------------------------------------------------------------------------------------------------------------------------------------------------------------------------------------------------------------------------------------------------------------------------------------------------------------------------------------------------------------------------------------------------------------------------------------------------------------------------------------------------------------------------------------------------------------------------------------------------------------------------------------------------------------------------------------------------------------------------------------------------------------------------------------------------------------------------------------------------------------------------------------------------------|
| <pre> DataParallel(   (module): VGG(     (features): Sequential(       (0): Conv2d(3, 25)       (1): BatchNorm2d(25)       (2): ReLU()       (3): Conv2d(25, 61)       (4): BatchNorm2d(61)       (5): ReLU()       (6): MaxPool2d()       (7): Conv2d(61, 76)       (8): BatchNorm2d(76)       (9): ReLU()       (10): Conv2d(76, 126)       (11): BatchNorm2d(126)       (12): ReLU()       (13): MaxPool2d()       (14): Conv2d(126, 83)       (15): BatchNorm2d(83)       (16): ReLU()       (17): Conv2d(83, 83)       (18): BatchNorm2d(83)       (19): ReLU()       (20): Conv2d(83, 77)       (21): BatchNorm2d(77)       (22): ReLU()       (23): MaxPool2d()       (24): Conv2d(77, 9)       (25): BatchNorm2d(9)       (26): ReLU()       (27): Conv2d(9, 9)       (28): BatchNorm2d(9)       (29): ReLU()       (30): Conv2d(9, 9)       (31): BatchNorm2d(9)       (32): ReLU()       (33): MaxPool2d()       (34): Conv2d(9, 9)       (35): BatchNorm2d(9)       (36): ReLU()       (37): Conv2d(9, 9)       (38): BatchNorm2d(9)       (39): ReLU()       (40): Conv2d(9, 9)       (41): BatchNorm2d(9)       (42): ReLU()       (43): MaxPool2d()       (44): AvgPool2d()     )     (classifier): Linear(9, 100)   ) ) </pre> | <pre> DataParallel(   (module): VGG(     (features): Sequential(       (0): Conv2d(3, 22)       (1): BatchNorm2d(22)       (2): ReLU()       (3): Conv2d(22, 48)       (4): BatchNorm2d(48)       (5): ReLU()       (6): MaxPool2d()       (7): Conv2d(48, 69)       (8): BatchNorm2d(69)       (9): ReLU()       (10): Conv2d(69, 97)       (11): BatchNorm2d(97)       (12): ReLU()       (13): MaxPool2d()       (14): Conv2d(97, 130)       (15): BatchNorm2d(130)       (16): ReLU()       (17): Conv2d(130, 124)       (18): BatchNorm2d(124)       (19): ReLU()       (20): Conv2d(124, 120)       (21): BatchNorm2d(120)       (22): ReLU()       (23): MaxPool2d()       (24): Conv2d(120, 103)       (25): BatchNorm2d(103)       (26): ReLU()       (27): Conv2d(103, 67)       (28): BatchNorm2d(67)       (29): ReLU()       (30): Conv2d(67, 36)       (31): BatchNorm2d(36)       (32): ReLU()       (33): MaxPool2d()       (34): Conv2d(36, 24)       (35): BatchNorm2d(24)       (36): ReLU()       (37): Conv2d(24, 30)       (38): BatchNorm2d(30)       (39): ReLU()       (40): Conv2d(30, 96)       (41): BatchNorm2d(96)       (42): ReLU()       (43): MaxPool2d()       (44): AvgPool2d()     )     (classifier): Linear(96, 100)   ) ) </pre> | <pre> DataParallel(   (module): VGG(     (features): Sequential(       (0): Conv2d(3, 18)       (1): BatchNorm2d(18)       (2): ReLU()       (3): Conv2d(18, 46)       (4): BatchNorm2d(46)       (5): ReLU()       (6): MaxPool2d()       (7): Conv2d(46, 66)       (8): BatchNorm2d(66)       (9): ReLU()       (10): Conv2d(66, 99)       (11): BatchNorm2d(99)       (12): ReLU()       (13): MaxPool2d()       (14): Conv2d(99, 133)       (15): BatchNorm2d(133)       (16): ReLU()       (17): Conv2d(133, 132)       (18): BatchNorm2d(132)       (19): ReLU()       (20): Conv2d(132, 127)       (21): BatchNorm2d(127)       (22): ReLU()       (23): MaxPool2d()       (24): Conv2d(127, 117)       (25): BatchNorm2d(117)       (26): ReLU()       (27): Conv2d(117, 76)       (28): BatchNorm2d(76)       (29): ReLU()       (30): Conv2d(76, 38)       (31): BatchNorm2d(38)       (32): ReLU()       (33): MaxPool2d()       (34): Conv2d(38, 32)       (35): BatchNorm2d(32)       (36): ReLU()       (37): Conv2d(32, 11)       (38): BatchNorm2d(11)       (39): ReLU()       (40): Conv2d(11, 41)       (41): BatchNorm2d(41)       (42): ReLU()       (43): MaxPool2d()       (44): AvgPool2d()     )     (classifier): Linear(41, 100)   ) ) </pre> |

Figure 8: Structures of the pruned networks in Table 3
